# Supplementary material for: Novel electronic adherence monitoring devices in children with asthma: a mixed-methods study
Source: PubMed Central journal article supplement — BMJ Open Respir Res. 2020 Nov 5;7(1):e000589. doi: 10.1136/bmjresp-2020-000589 (PMC7646352; doi:10.1136/bmjresp-2020-000589), 2020-11-05
Supplement: bmjresp-2020-000589supp002.pdf [file bmjresp-2020-000589supp002.pdf]

**Supplementary Table 2:****Baseline demographics of all participants**

|                                       | <b>Participants who completed study</b> | <b>Participants who did not complete study</b> |
|---------------------------------------|-----------------------------------------|------------------------------------------------|
| <b>Subjects (%)</b>                   | 18 (51%)                                | 17 (49%)                                       |
| <b>Male (Female)</b>                  | 11 (7)                                  | 12 (5)                                         |
| <b>Age (years)</b>                    | 13.5 (7-16)                             | 10 (6-15)                                      |
| <b>ACT/c ACT score</b>                | 15.45± 6.23                             | 18.13 ± 5.89                                   |
| <b>m-PAQLQ score</b>                  | 4.86 ± 1.8                              | 5.34 ± 1.31                                    |
| <b>FEV1 % Pred</b>                    | 77.54 ± 8.83                            | 72.22 ± 18.5                                   |
| <b>BDR %</b>                          | 10.58 ± 13.2                            | 15.42 ±16.71                                   |
| <b>ICS dose FP equivalent mcg/day</b> | 500 (100 - 1000)                        | 400 (100 - 500)                                |

ACT: Asthma Control Test, c-ACT: Child Asthma Control Test , m-PAQLQ : Mini Paediatric Asthma Quality of Life Questionnaire score, ICS: Inhaled corticosteroid, FP: Fluticasone propionate equivalence. Figures are quoted as Median (range), mean ±SD
