# Supplementary material for: Novel electronic adherence monitoring devices in children with asthma: a mixed-methods study
Source: HighWire-hosted journal article supplement (doi:10.1136/bmjresp-2020-000589), 2020-11-01
Supplement: bmjresp-2020-000589supp003_data_supplement.pdf [file bmjresp-2020-000589supp003_data_supplement.pdf]

**Supplementary Table 3:**  
**Comparison of asthma control, spirometry and quality of life scores with each NEMD**

|                                   | R-DOT      | Hailie       | Rafi-tone    | INCA       |
|-----------------------------------|------------|--------------|--------------|------------|
| <b>Participant Numbers</b>        | 8          | 6            | 2            | 2          |
| <b>Number of days monitored</b>   | 54 (8-145) | 88.5 (6-120) | 25.5 (25-26) | 37 (14-60) |
| <b>% Adherence</b>                | 72 ± 13    | 65 ± 19      | 87 ± 7       | No data    |
| <b>ACT/c-ACT baseline</b>         | 16 ± 5.6   | 17 ± 7.9     | 7            | 17 ± 4.2   |
| <b>ACT/c-ACT Follow up</b>        | 15.2 ± 8.2 | 18.7 ± 5.1   | 19           | 21.5 ± 0.7 |
| <b>m-PAQLQ Baseline</b>           | 4.7 ± 2.2  | 5.1 ± 2.1    | 4.2          | 4.31       |
| <b>m-PAQLQ Follow up</b>          | 4.9 ± 1.58 | 5.4 ± 2.1    | 4.5          | 6          |
| <b>FEV1 % predicted Baseline</b>  | 81 ± 7     | 77.8 ± 9     | 97           | 60         |
| <b>FEV1 % predicted Follow up</b> | 79 ± 10    | 85 ± 8       | 110          | 85         |
| <b>FEV1 % predicted p value</b>   | 0.68       | 0.17         | -            | -          |
| <b>FeNO ppb Baseline</b>          | 37.1 ± 22  | 53 ± 22      | 10           | 86         |
| <b>FeNO ppb follow up</b>         | 40.7 ± 37  | 46 ± 28      | 24           | 12         |
| <b>Number on biologic therapy</b> | 1          | 2            | 0            | 0          |

ACT: Asthma Control Test, c-ACT: Child Asthma Control Test, m-PAQLQ: Mini Paediatric Asthma Quality of Life Questionnaire score, ICS: Inhaled corticosteroid, FP: Fluticasone propionate equivalence. Figures are quoted as Median (range), mean ± SD
